# Supplementary material for: One-pot synthesis of highly mechanical and redox-degradable polyurethane hydrogels based on tetra-PEG and disulfide/thiol chemistry
Source: Royal Society of Chemistry journal article supplement (doi:10.1039/c6ra04320h), 2016-01-01
Supplement: c6ra04320h1.pdf [file c6ra04320h1.pdf]

## Supporting information

### **One-Pot Synthesis of Highly Mechanical and Redox-Degradable Polyurathane Hydrogels Based-on Tetra-PEG and Disulfide/thiol Chemistry**

*Haiyan Jia, Zhangjun Huang, Zhao Li, Zhen Zheng, Xinling Wang\*[a]*

School of Chemistry and Chemical Engineering, State Key Laboratory of Metal Matrix Composites, Shanghai Jiao Tong University, Shanghai 200240, China;

E-mail: xlwang@sjtu.edu.cn; Fax: +86 21 5474 1297; Tel: +86 21 5474 5817

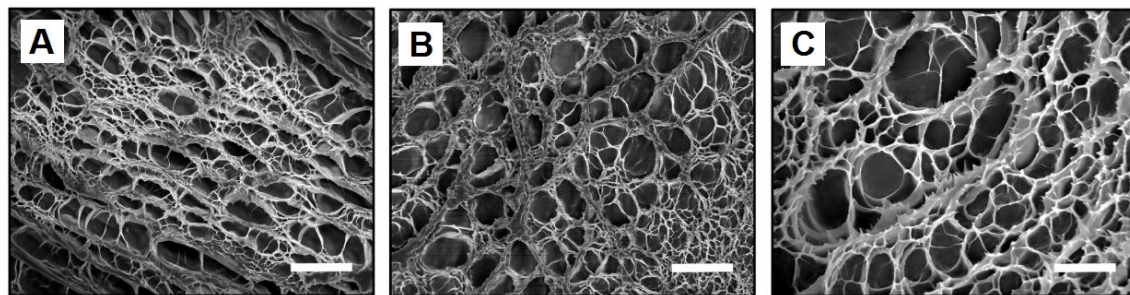

**Figure S1.** Network morphology of X1(A), X2(A), X3(A) hydrogels by SEM. Scale bar: 10 μm.

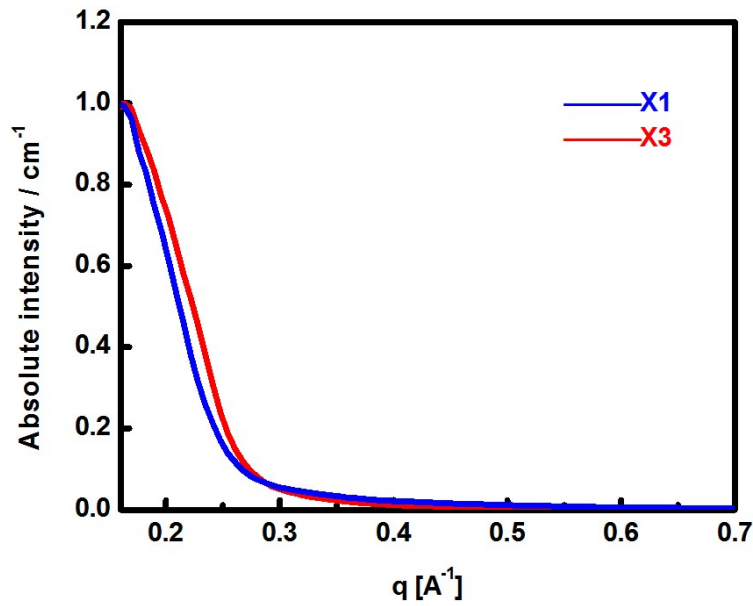

**Figure S2.** SAXS spectra of X1 and X3.

The background corrected SAXS intensities of X1, X3 were displayed in Figure S2. In a plot of scattered intensity ( $I(q)$ ) versus scattering vector ( $q$ ). The peak maxima ( $q_{\max}$ ) are related to the mean spacing between the phase separated hard domains ( $d$ ),  $d=2\pi/q_{\max}$ . However, there is no obvious peak in the SAXS data, but signal from  $0.15 \text{ nm}^{-1}$  to  $0.6 \text{ nm}^{-1}$ , which means the microphase separation of these polyurethane hydrogels is random, not in a regular form. Consequently, the extents of microphase separation cannot be calculated. The calculation method was explained particularly in *refer 1, 2*.

## Reference

- [1] *Macromolecules*, 2007, 40, 5441-5449.
- [2] *Journal of polymer science part B*, 2011, 49, 865 – 872.
